# Supplementary material
Source: ML conference proceedings conference paper supplement (https://proceedings.neurips.cc/paper_files/paper/2019/hash/9c449771d0edc923c2713a7462cefa3b-Abstract.html)
Supplement: Supplementary file [file 9c449771d0edc923c2713a7462cefa3b-Supplemental.zip]

## Supplementary Material

### B Converse Theorem Proofs

#### B.1 Proof of Theorem 3.2

First consider the case when  $n = 1$  with scalar inputs and outputs. Let  $\theta_c = (w_c, f_c, b_c, c_c)$  be the parameters of a contractive RNN with  $f_c = c_c = 1$ ,  $b_c = 0$  and  $w_c \in (0, 1)$ . Hence, the contractive RNN is given by

$$h_c^{(k)} = \phi(w_c h_c^{(k-1)} + x^{(k)}), \quad y^{(k)} = h_c^{(k)}, \quad (12)$$

and  $\phi(z) = \max\{0, z\}$  is the ReLU activation. Suppose  $\Theta_u$  are the parameters of an equivalent URNN. If  $\Theta$  has less than  $2n = 2$  states, it must have  $n = 1$  state. Let the equivalent URNN be

$$h_u^{(k)} = \phi(w_u h_u^{(k-1)} + f_u x^{(k)} + b_u), \quad y^{(k)} = c_u h_u^{(k)}, \quad (13)$$

for some parameters  $\Theta_u = (w_u, f_u, b_u, c_u)$ . Since  $w_u$  is orthogonal, either  $w_u = 1$  or  $w_u = -1$ . Also, either  $f_u > 0$  or  $f_u < 0$ . First, consider the case when  $w_u = 1$  and  $f_u > 0$ . Then, there exists a large enough input  $x^{(k)}$  such that for all time steps  $k$ , both systems are operating in the active phase of ReLU. Therefore, we have two equivalent linear systems,

$$\text{contractive RNN: } h_c^{(k)} = w_c h_c^{(k-1)} + x^{(k)}, \quad y^{(k)} = h_c^{(k)} \quad (14)$$

$$\text{URNN: } h_u^{(k)} = h_u^{(k-1)} + f_u x^{(k)} + b_u, \quad y^{(k)} = c_u h_u^{(k)}. \quad (15)$$

In order to have identical input-output mapping for these linear systems for all  $x$ , it is required that  $w_c = 1$ , which is a contradiction. The other cases  $w_c = -1$  and  $f_u < 0$  can be treated similarly. Therefore, at least  $n = 2$  states are needed for the URNN to match the contractive RNN with  $n = 1$  state.

For the case of general  $n$ , consider the contractive RNN,

$$\mathbf{h}^{(k)} = \phi(\mathbf{W}\mathbf{h}^{(k-1)} + \mathbf{F}\mathbf{x}^{(k)} + \mathbf{b}), \quad \mathbf{y}^{(k)} = \mathbf{C}\mathbf{h}^{(k)}, \quad (16)$$

where  $\mathbf{W} = \text{diag}(w_c, w_c, \dots, w_c)$ ,  $\mathbf{F} = \text{diag}(f_c, f_c, \dots, f_c)$ ,  $\mathbf{b} = b_c \mathbf{1}_{n \times 1}$ , and  $\mathbf{C} = \text{diag}(c_c, c_c, \dots, c_c)$ . This system is separable in that if  $\mathbf{y} = G(\mathbf{x})$  then  $y_i = G(x_i, \theta_c)$  for each input  $i$ . A URNN system will need 2 states for each scalar system requiring a total of  $2n$  states.

#### B.2 Proof of Theorem 4.1

We use the same scalar contractive RNN (12), but with a sigmoid activation  $\phi(z) = 1/(1 + e^{-z})$ . Let  $\Theta = (\mathbf{W}_u, \mathbf{f}_u, \mathbf{c}_u, \mathbf{b}_u)$  be the parameters of any URNN with scalar input and outputs. Suppose the URNN is controllable and observable at an input value  $x^*$ . Let  $h_c^*$  and  $\mathbf{h}_u^*$  be, respectively, the fixed points of the hidden states for the contractive RNN and URNN:

$$\text{contractive RNN: } h_c^* = \phi(w_c h_c^* + x^*), \quad (17)$$

$$\text{URNN: } \mathbf{h}_u^* = \phi(\mathbf{W}_u \mathbf{h}_u^* + \mathbf{f}_u x^* + \mathbf{b}_u). \quad (18)$$

We take the linearizations [24] of each system around its fixed point and apply a small perturbation  $\Delta x$  around  $x^*$ . Therefore, we have two linear systems with identical input-output mapping given by,

$$\text{contractive RNN: } \Delta h_c^{(k)} = d_c(w_c \Delta h_c^{(k-1)} + \Delta x^{(k)}), \quad y^{(k)} = \Delta h_c^{(k)} + h_c^*, \quad (19)$$

$$\text{URNN: } \Delta \mathbf{h}_u^{(k)} = \mathbf{D}_u(\mathbf{W}_u \Delta \mathbf{h}_u^{(k-1)} + \mathbf{f}_u^T \Delta x^{(k)}), \quad y^{(k)} = \mathbf{c}_u^T \Delta \mathbf{h}_u + \mathbf{c}_u^T \mathbf{h}_u^*, \quad (20)$$

where

$$d_c = \phi'(z_c^* = w_c h_c^* + x^*), \quad \mathbf{D}_u = \phi'(\mathbf{W}_u \mathbf{h}_u^* + \mathbf{f}_u x^* + \mathbf{b}_u),$$

are the derivatives of the activations at the fixed points. Since both systems are controllable and observable, their dimensions must be the same and the eigenvalues of the transition matrix must match. In particular, the URNN must be scalar, so  $\mathbf{W}_u = w_u$  for some scalar  $w_u$ . For orthogonality, either  $w_u = 1$  or  $w_u = -1$ . We look at the  $w_u = 1$  case; the  $w_u = -1$  case is similar. Since the eigenvalues of the transition matrix must match we have,

$$d_c w_c = d_u \Rightarrow \phi'(w_c h_c^* + x^*) w_c = \phi'(h_u^* + f_u x^* + b_u). \quad (21)$$

377 where  $h_u^*$  and  $h_c^*$  are the solutions to the fixed point equations:

$$h_c^* = \phi(w_c h_c + x^*), \quad h_u^* = \phi(h_u^* + f_b x^* + b_u). \quad (22)$$

378 Also, since two systems have the same output,

$$h_c^* = c_u h_u^*. \quad (23)$$

379 Now, (21) must hold at any input  $x^*$  where the URNN is controllable and observable. If the URNN  
 380 is controllable and observable at some  $x^*$ , it is controllable and observable in a neighborhood of  
 381  $x^*$ . Hence, (21) and (23) holds in some neighborhood of  $x^*$ . To write this mathematically, define the  
 382 functions,

$$g_c(x^*) := \begin{bmatrix} w_c \phi'(w_c h_c^* + x^*) \\ h_c^* \end{bmatrix}, \quad g_u(x^*) := \begin{bmatrix} \phi'(h_u^* + f_u x^* + b_u) \\ c_u h_u^* \end{bmatrix}, \quad (24)$$

383 where, for a given  $x^*$ ,  $h_u^*$  and  $h_c^*$  are the solutions to the fixed point equations (22). We must have  
 384 that  $g_c(x^*) = g_u(x^*)$  for all  $x^*$  in some neighborhood. Taking derivatives of (24) and using the fact  
 385 that  $\phi(z)$  being a sigmoid, one can show that this matching can only occur when,

$$w_c = 1, \quad b_u = 0, \quad c_u = 1.$$

386 This is a contradiction since we have assumed that the RNN system is contractive which requires  
 387  $|w_c| = 1$ .
